# Supplementary material
Source: MDPI journal article supplement (https://www.mdpi.com/2813-0464/2/1/4)
Supplement: s1 [file s1]

**Supplementary Table S1.** Bacterial species with less than 1% of relative abundance observed in the culture sample.

| Classis                  | Genus                                                     | Relative abundance (%) |
|--------------------------|-----------------------------------------------------------|------------------------|
| $\alpha$ -Proteobacteria | <i>Roseomonas</i>                                         | 0.69                   |
|                          | <i>Aureimonas</i>                                         | 0.49                   |
|                          | <i>Rubellimicrobium</i>                                   | 0.47                   |
|                          | <i>Mitochondria</i>                                       | 0.45                   |
|                          | <i>Craurococcus/Caldovatus</i>                            | 0.43                   |
|                          | <i>Belnapia</i>                                           | 0.33                   |
|                          | <i>Allorhizobium/Neorhizobium/Pararhizobium/Rhizobium</i> | 0.30                   |
|                          | <i>Erythrobacter</i>                                      | 0.27                   |
|                          | <i>Reyranella</i>                                         | 0.26                   |
|                          | <i>Novosphingobium</i>                                    | 0.16                   |
|                          | <i>Brevundimonas</i>                                      | 0.13                   |
|                          | <i>Microvirga</i>                                         | 0.09                   |
|                          | <i>Paracoccus</i>                                         | 0.08                   |
|                          | <i>Rubritepida</i>                                        | 0.07                   |
|                          | <i>Maribius</i>                                           | 0.06                   |
|                          | <i>Psychroglaciecola</i>                                  | 0.06                   |
|                          | <i>Skermanella</i>                                        | 0.04                   |
|                          | <i>Devosia</i>                                            | 0.03                   |
| $\gamma$ -Proteobacteria | <i>Pantoea</i>                                            | 0.43                   |
|                          | <i>Noviherbaspirillum</i>                                 | 0.35                   |
|                          | <i>Escherichia/Shigella</i>                               | 0.13                   |
|                          | <i>Duganella</i>                                          | 0.09                   |
|                          | <i>Limnobacter</i>                                        | 0.08                   |
|                          | <i>Aquabacterium</i>                                      | 0.06                   |
|                          | <i>Lysobacter</i>                                         | 0.05                   |
|                          | <i>Legionella</i>                                         | 0.01                   |
|                          | <i>Acidibacter</i>                                        | 0.01                   |
| Abditibacteria           | <i>Abditibacterium</i>                                    | 0.07                   |
| Acidimicrobiia           | <i>Iamia</i>                                              | 0.01                   |
| Acidobacteriae           | <i>Bryobacter</i>                                         | 0.02                   |
| Actinobacteria           | <i>Modestobacter</i>                                      | 0.45                   |
|                          | <i>Klenkia</i>                                            | 0.26                   |

|                  |                          |      |
|------------------|--------------------------|------|
|                  | <i>Blastococcus</i>      | 0.18 |
|                  | <i>Actinomycetospora</i> | 0.14 |
|                  | <i>Nocardioides</i>      | 0.04 |
|                  | <i>Quadrisphaera</i>     | 0.02 |
| Armatimonadia    | <i>Armatimonadales</i>   | 0.67 |
| Bacilli          | <i>Bacillus</i>          | 0.19 |
| Bacteroidia      | <i>Spirosoma</i>         | 0.44 |
|                  | <i>Chryseobacterium</i>  | 0.27 |
|                  | <i>Rhodocytophaga</i>    | 0.24 |
|                  | <i>Asinibacterium</i>    | 0.18 |
|                  | <i>Fibrella</i>          | 0.10 |
|                  | <i>Pontibacter</i>       | 0.07 |
|                  | <i>Adhaeribacter</i>     | 0.07 |
|                  | <i>Flavobacterium</i>    | 0.07 |
|                  | <i>Flavisolibacter</i>   | 0.06 |
|                  | <i>Edaphobaculum</i>     | 0.04 |
|                  | <i>Gramella</i>          | 0.02 |
|                  | <i>Lewinella</i>         | 0.02 |
| Bdellovibrionia  | <i>Peredibacter</i>      | 0.01 |
| Blastocatellia   | <i>Blastocatella</i>     | 0.42 |
| Clostridia       | <i>Sporacetigenium</i>   | 0.01 |
| Cyanobacteriia   | <i>Chloroplast</i>       | 0.98 |
|                  | <i>Calothrix</i>         | 0.59 |
|                  | <i>Leptolyngbya</i>      | 0.11 |
|                  | <i>Mastigocladopsis</i>  | 0.07 |
|                  | <i>Pleurocapsa</i>       | 0.01 |
| Deinococci       | <i>Deinococcus</i>       | 0.66 |
|                  | <i>Truepera</i>          | 0.35 |
| Fimbriimonadia   | <i>Fimbriimonadaceae</i> | 0.54 |
| Gemmatimonadetes | <i>Roseisolibacter</i>   | 0.80 |
|                  | <i>Gemmatimonas</i>      | 0.02 |
| Phycisphaerae    | <i>Tepidisphaera</i>     | 0.15 |
| Planctomycetes   | <i>Tundrisphaera</i>     | 0.53 |
|                  | <i>Fimbrüiglobus</i>     | 0.05 |
|                  | <i>Gemmata</i>           | 0.02 |
|                  | <i>Pirellula</i>         | 0.01 |

|                  |                           |      |
|------------------|---------------------------|------|
| Polyangia        | <i>Nannocystis</i>        | 0.03 |
| Rhodothermia     | <i>Rubrivirga</i>         | 0.19 |
| Rubrobacteria    | <i>Rubrobacter</i>        | 0.47 |
| Thermoleophilia  | <i>Solirubrobacter</i>    | 0.01 |
| Vampirivibrionia | <i>Obscuribacteraceae</i> | 0.05 |
| Verrucomicrobiae | <i>Luteolibacter</i>      | 0.02 |
|                  | Unclassified bacteria     | 12.0 |
